# Supplementary material for: Extreme waves analysis based on atmospheric patterns classification: an application along the Italian coast
Source: Copernicus journal article supplement (doi:10.5194/nhess-2019-320), 2019-10-09
Supplement: Supplementary file 1 [file nhess-2019-320-supplement.pdf]

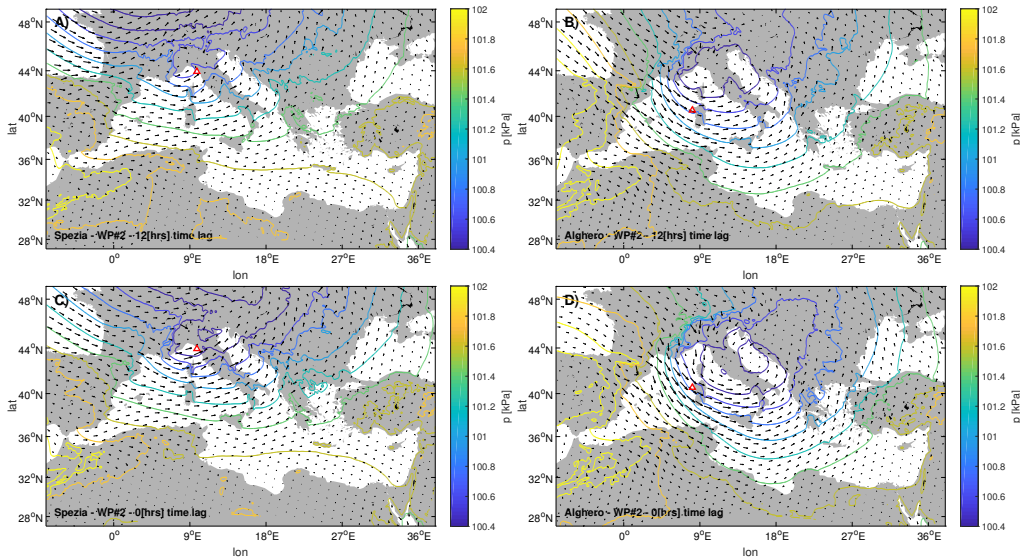

**Fig 1.** Average MSLP for the  $H_s$  peaks of WP#2. Panel A): La Spezia (B1),  $\Delta t$  equals 12 hours; panel B) Alghero (B2),  $\Delta t$  equals 12 hours; panel C): La Spezia,  $\Delta t$  equals 0 hours; panel D): Alghero,  $\Delta t$  equals 0 hours

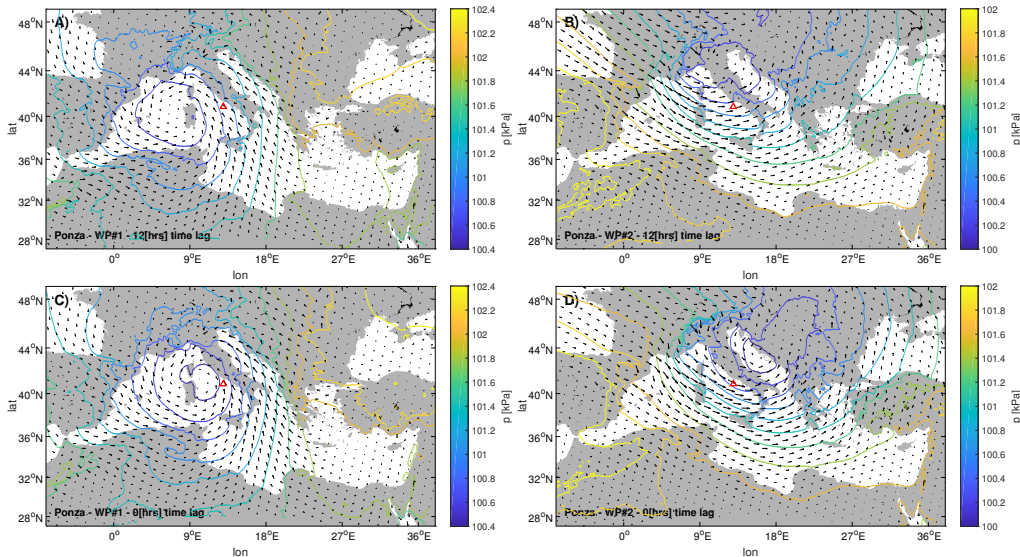

**Fig 2.** Average MSLP for the  $H_s$  peaks in Ponza (B3). Panel A): WP#1,  $\Delta t$  equals 12 hours; panel B) WP#2,  $\Delta t$  equals 12 hours; panel C): WP#1,  $\Delta t$  equals 0 hours; panel D): WP#2,  $\Delta t$  equals 0 hours

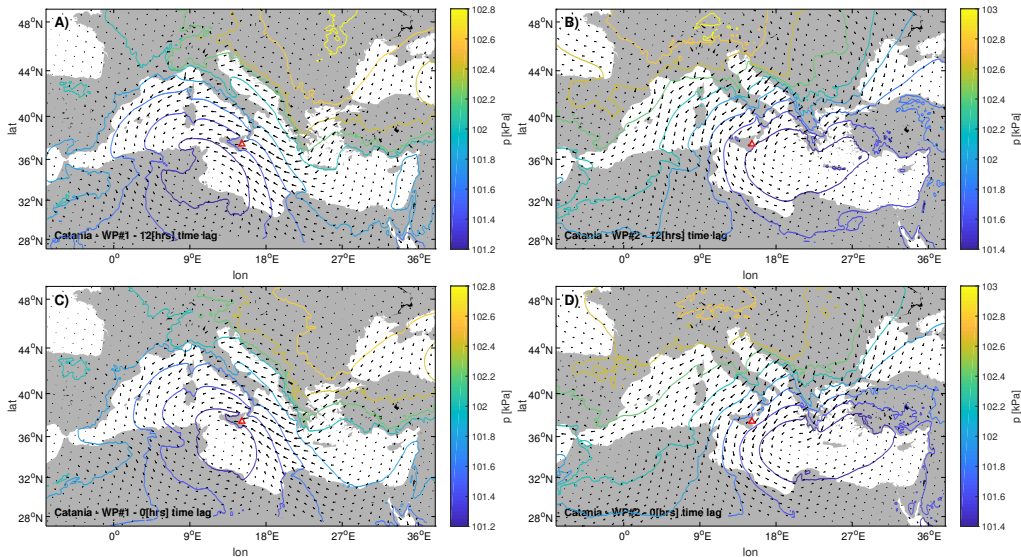

**Fig 3.** Average MSLP for the  $H_s$  peaks in Catania (B5). Panel A): WP#1,  $\Delta t$  equals 12 hours; panel B) WP#2,  $\Delta t$  equals 12 hours; panel C): WP#1,  $\Delta t$  equals 0 hours; panel D): WP#2,  $\Delta t$  equals 0 hours

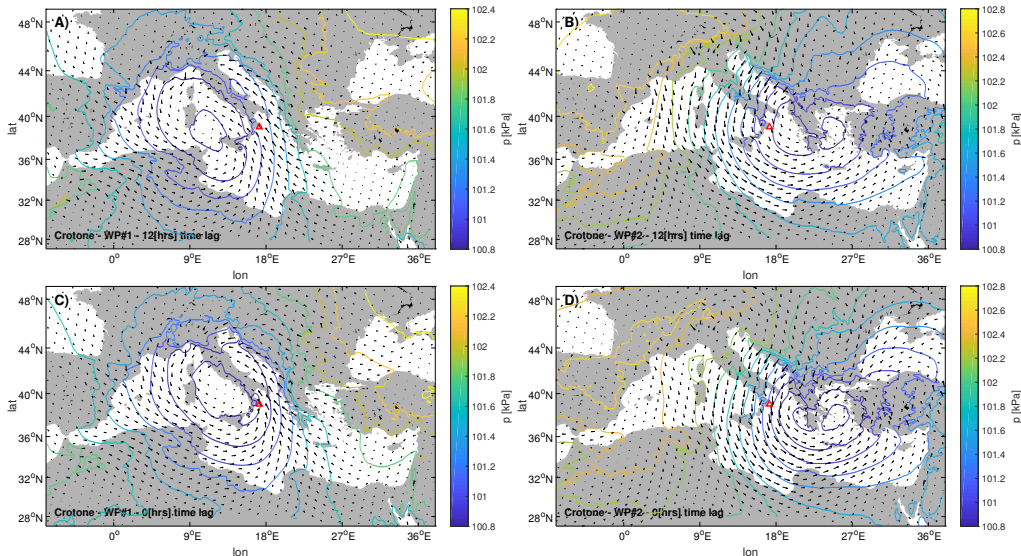

**Fig 4.** Average MSLP for the  $H_s$  peaks in Crotona (B6). Panel A): WP#1,  $\Delta t$  equals 12 hours; panel B) WP#2,  $\Delta t$  equals 12 hours; panel C): WP#1,  $\Delta t$  equals 0 hours; panel D): WP#2,  $\Delta t$  equals 0 hours

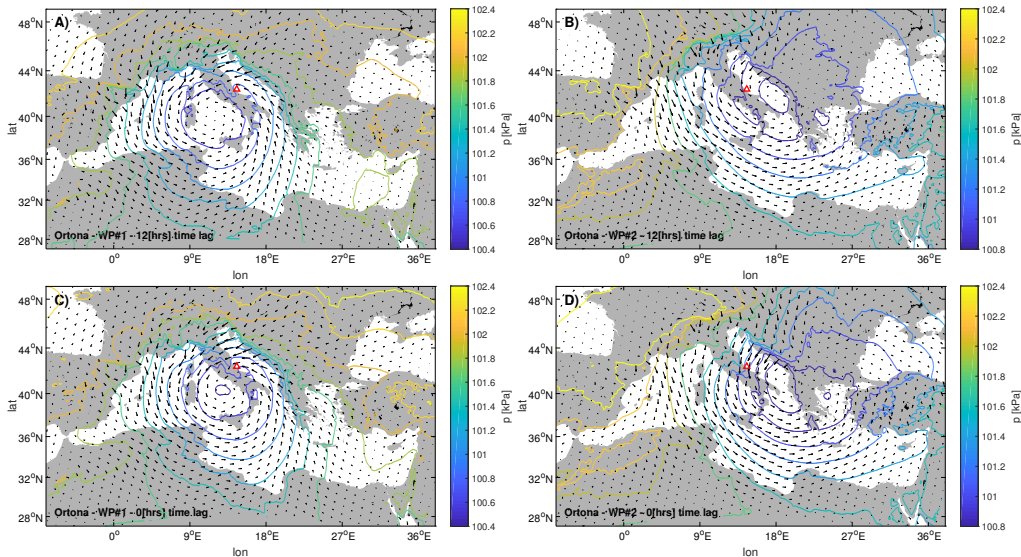

**Fig 5.** Average MSLP for the  $H_s$  peaks in Ortona (B8). Panel A): WP#1,  $\Delta t$  equals 12 hours; panel B) WP#2,  $\Delta t$  equals 12 hours; panel C): WP#1,  $\Delta t$  equals 0 hours; panel D): WP#2,  $\Delta t$  equals 0 hours

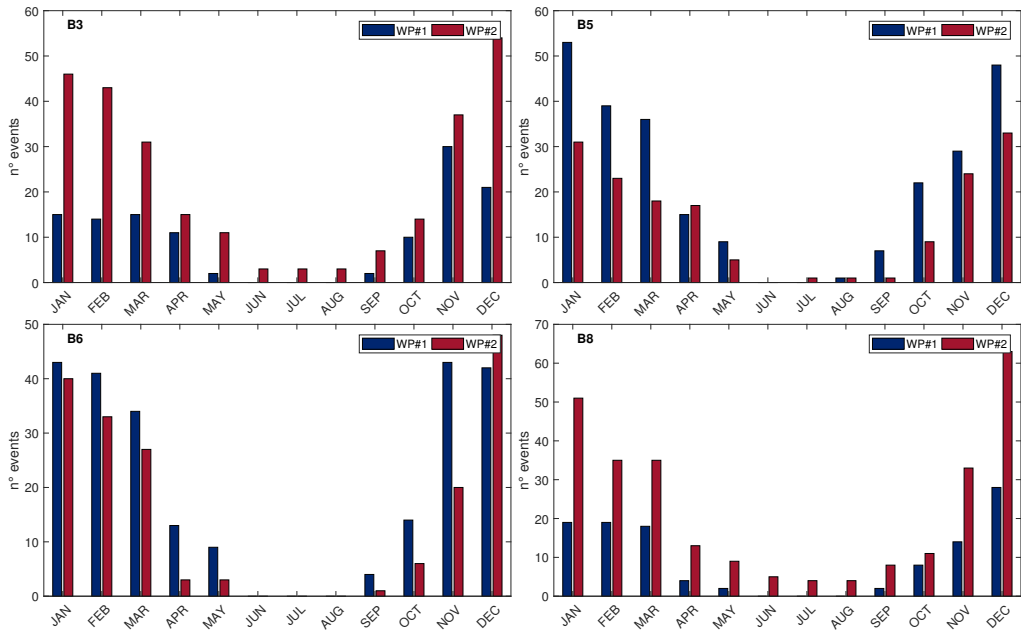

**Fig 6.** Monthly number of events for different WP. The panels show in the upper left corner the code of the location they refer to

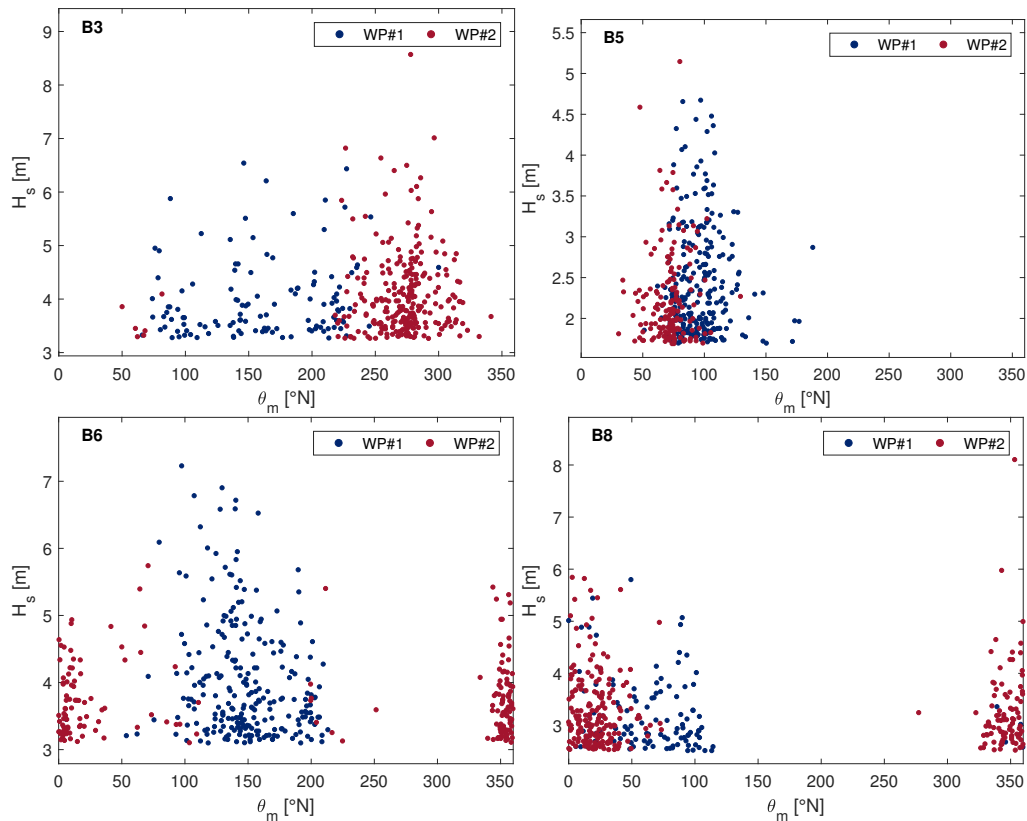

**Fig 7.** Scatter plot of  $H_s$  and  $\theta_m$  due to different WP. The panels show in the upper left corner the code of the location they refer to

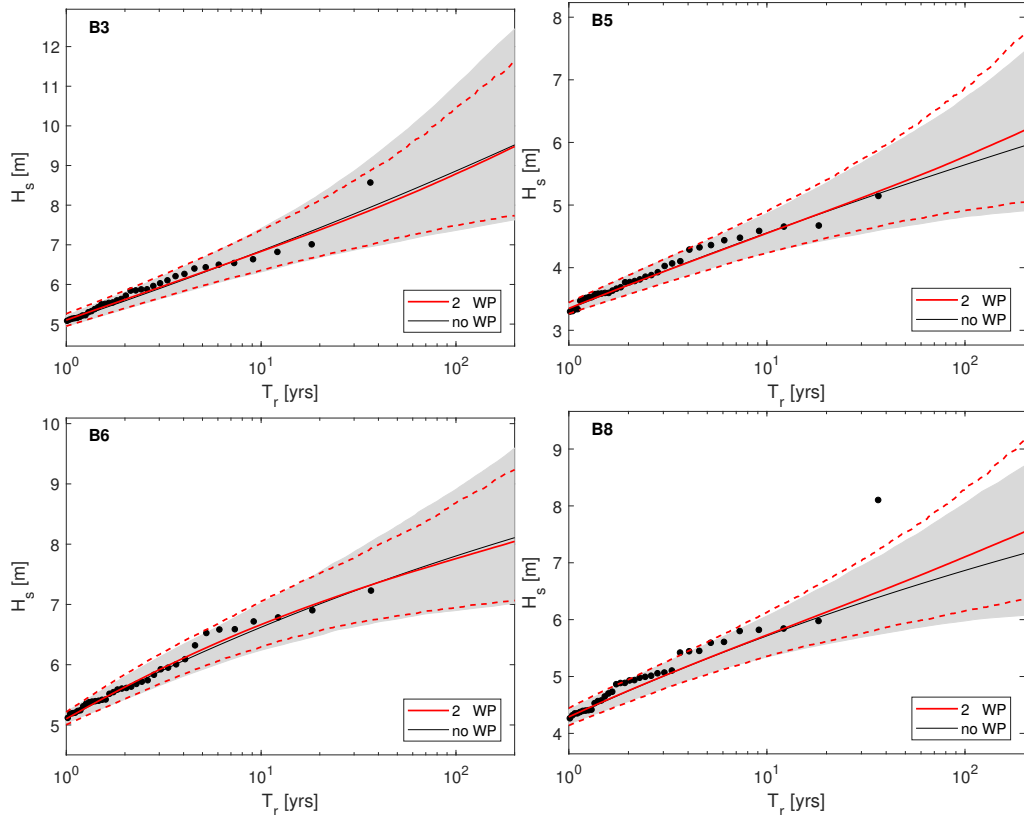

**Fig 8.** Omni-WP extreme value distributions of  $H_s$  obtained from the whole set of peaks (black) and from combining single-WP distributions (red), along with 90% confidence intervals (grey shadow and red dashed lines, respectively). The panels show in the upper left corner the code of the location they refer to
